# Supplementary figures and images for: A metabolic labeling approach toward proteomic analysis of mucin-type O-linked glycosylation
Source: Atypon-hosted journal article supplement (doi:10.1073/pnas.2335201100), 2003-12-01

A)

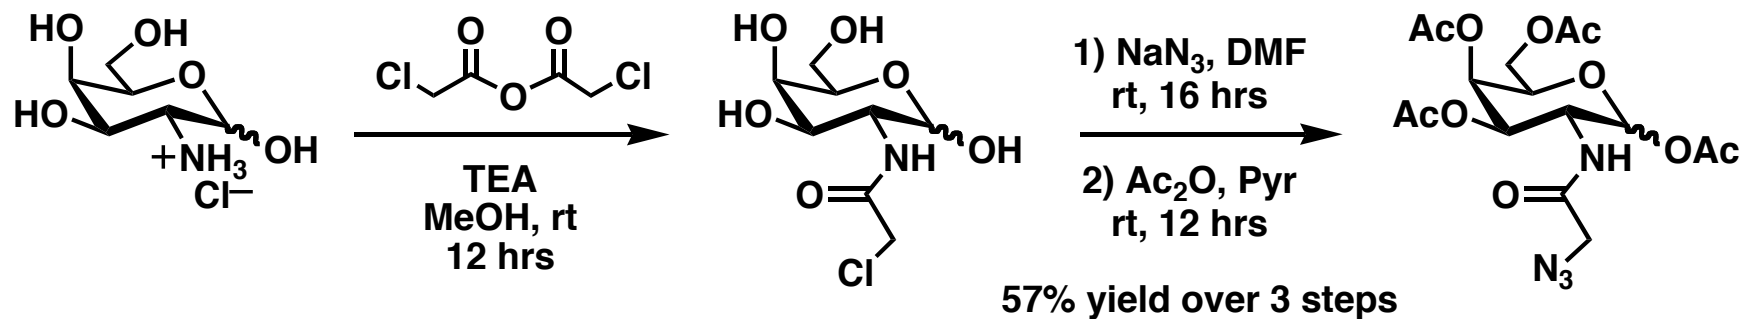

B)

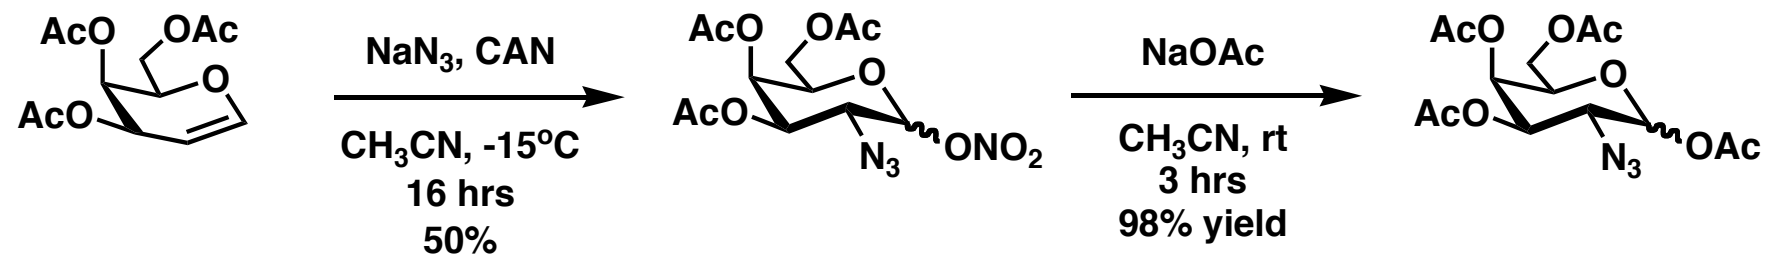

C)

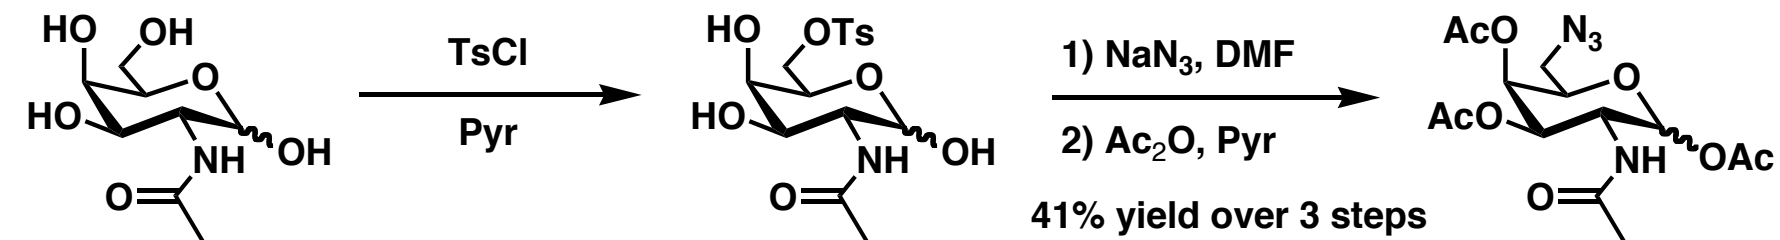

Supplement: 5201Scheme1.pdf [file 5201Scheme1.pdf]
